# Supplementary material for: Heterogeneity of COVID-19 Risk Perception: A Socio-Mathematical Model
Source: MDPI journal article supplement (doi:10.3390/ijerph182111007), 2021-10-20
Supplement: s1 [file s1]

**Table S1.** List of questions used for the calculation of the risk perception vector and value, organized into the three risk dimensions of the conceptual model: Knowledge, perception/severity of risk assessment, and description and evaluation of preventive measures.

| Knowledge                                                                                 |                                                                                             |    |                                                                                           |                                                                                     |    |
|-------------------------------------------------------------------------------------------|---------------------------------------------------------------------------------------------|----|-------------------------------------------------------------------------------------------|-------------------------------------------------------------------------------------|----|
| You believe that the origin of the coronavirus (COVID-19) epidemic is due to:             |                                                                                             |    | Which populations are most at risk if you contract the COVID-19 coronavirus?              |                                                                                     |    |
| Q10                                                                                       | Climate change                                                                              | 1  | Q11                                                                                       | Children                                                                            | -1 |
|                                                                                           | Biological changes                                                                          | 1  |                                                                                           | Young people                                                                        | -1 |
|                                                                                           | Social changes                                                                              | 1  |                                                                                           | Adults under 60 years of age                                                        | -1 |
|                                                                                           | Genetic manipulation                                                                        | 1  |                                                                                           | Older adults (60 years and older)                                                   | 1  |
|                                                                                           | Lack of hygiene                                                                             | 1  |                                                                                           | People with chronic diseases (diabetes, hypertension, cancer, obesity among others) | 1  |
|                                                                                           | Poverty                                                                                     | 1  |                                                                                           | Pregnant                                                                            | 1  |
|                                                                                           | Human interventions in nature                                                               | 1  |                                                                                           | Other populations                                                                   | -1 |
|                                                                                           | National/international political manipulations                                              | 1  |                                                                                           | All equally                                                                         | -1 |
|                                                                                           | Bioterrorism/terrorism                                                                      | 1  |                                                                                           |                                                                                     |    |
|                                                                                           | An invention of the authorities                                                             | -1 |                                                                                           |                                                                                     |    |
| Economic crisis                                                                           | 1                                                                                           |    |                                                                                           |                                                                                     |    |
| Not known                                                                                 | -1                                                                                          |    |                                                                                           |                                                                                     |    |
| Do you know through what mechanisms a person can be infected by the COVID-19 coronavirus? |                                                                                             |    | How much do you think you know about coronavirus (COVID-19) infection?                    |                                                                                     |    |
| Q12                                                                                       | Physical closeness to a person without symptoms                                             | 1  | Q13                                                                                       | A lot                                                                               | 1  |
|                                                                                           | Physical closeness to a person with symptoms                                                | 1  |                                                                                           | Pretty much                                                                         | 1  |
|                                                                                           | Closeness to someone who recently returned from abroad                                      | 1  |                                                                                           | Regular                                                                             | -1 |
|                                                                                           | Through sneezing or drops of saliva                                                         | 1  |                                                                                           | Little                                                                              | -1 |
|                                                                                           | Touching surfaces (furniture, doorknobs, doors, floor, objects) contaminated with the virus | 1  |                                                                                           | Nothing                                                                             | -1 |
|                                                                                           | In the food                                                                                 | -1 |                                                                                           |                                                                                     |    |
|                                                                                           | In the air                                                                                  | -1 |                                                                                           |                                                                                     |    |
|                                                                                           | Where there are many people                                                                 | 1  |                                                                                           |                                                                                     |    |
| Perception/severity of risk                                                               |                                                                                             |    |                                                                                           |                                                                                     |    |
| How would you rate the situation of the coronavirus (COVID-19) epidemic in Mexico?        |                                                                                             |    | How would you describe the situation of the coronavirus (COVID-19) epidemic in the world? |                                                                                     |    |
| Q17                                                                                       | Very serious                                                                                | 1  | Q18                                                                                       | Very serious                                                                        | 1  |
|                                                                                           | Grave                                                                                       | 1  |                                                                                           | Grave                                                                               | 1  |
|                                                                                           | Regular                                                                                     | -1 |                                                                                           | Regular                                                                             | -1 |
|                                                                                           | Little serious                                                                              | -1 |                                                                                           | Little serious                                                                      | -1 |
|                                                                                           | Nothing serious                                                                             | -1 |                                                                                           | Nothing serious                                                                     | -1 |
| Q20                                                                                       | How severe do you consider coronavirus (COVID-19) infection to be?                          |    | Q21                                                                                       | How likely do you think it is that you will catch the coronavirus (COVID-19)?       |    |
|                                                                                           | Very serious                                                                                | 1  |                                                                                           | Highly probable                                                                     | 1  |

|                     |                                                                                                                                        |    |     |                                                                                                                                                 |    |
|---------------------|----------------------------------------------------------------------------------------------------------------------------------------|----|-----|-------------------------------------------------------------------------------------------------------------------------------------------------|----|
|                     | Grave                                                                                                                                  | 1  |     | Very likely                                                                                                                                     | 1  |
|                     | Regular                                                                                                                                | -1 |     | Regular                                                                                                                                         | -1 |
|                     | Little serious                                                                                                                         | -1 |     | Little                                                                                                                                          | -1 |
|                     | Nothing serious                                                                                                                        | -1 |     | Nothing                                                                                                                                         | -1 |
|                     | If you don't take preventive measures against coronavirus (COVID-19): How likely are you to get infected?                              |    |     | If you don't take preventive measures against coronavirus (COVID-19): How likely is it that someone in your family or at home will be infected? |    |
| P43                 | Very high risk                                                                                                                         | 1  | P43 | Very high risk                                                                                                                                  | 1  |
| (1)                 | High risk                                                                                                                              | 1  | (2) | High risk                                                                                                                                       | 1  |
|                     | Neither high nor low risk                                                                                                              | -1 |     | Neither high nor low risk                                                                                                                       | -1 |
|                     | Low risk                                                                                                                               | -1 |     | Low risk                                                                                                                                        | -1 |
|                     | Very low risk                                                                                                                          | -1 |     | Very low risk                                                                                                                                   | -1 |
|                     | How much do you think the following collective actions taken by the authorities to confront the coronavirus (COVID-19) epidemic serve? |    |     | Do you think that the risk of contagion when returning to classes and work activities at UNAM is?:                                              |    |
|                     | Suspension of classes                                                                                                                  |    |     |                                                                                                                                                 |    |
|                     | Cancellation of cultural, sporting and artistic events                                                                                 |    |     | Very high                                                                                                                                       | 1  |
|                     | Closure of cinemas, museums, theatres, bars                                                                                            |    |     |                                                                                                                                                 |    |
|                     | Closure of parks and zoos                                                                                                              |    |     | High                                                                                                                                            | 1  |
|                     | Hygienic prevention measures requested from society                                                                                    |    |     |                                                                                                                                                 |    |
|                     | Special operation to monitor hygiene in transport                                                                                      |    |     | Moderate                                                                                                                                        | -1 |
| P48                 | Cancellation of activities in religious spaces (temples, churches)                                                                     |    | P50 |                                                                                                                                                 |    |
|                     | Temporary suspension of activities in commercial establishments                                                                        |    |     | Low                                                                                                                                             | -1 |
|                     | Suspension of non-essential economic activities                                                                                        |    |     |                                                                                                                                                 |    |
|                     | Apply to stay at home                                                                                                                  |    |     | None                                                                                                                                            | -1 |
|                     | Much                                                                                                                                   | 1  |     |                                                                                                                                                 |    |
|                     | A lot                                                                                                                                  | 1  |     |                                                                                                                                                 |    |
|                     | Regular                                                                                                                                | -1 |     |                                                                                                                                                 |    |
|                     | Little                                                                                                                                 | -1 |     | I do not know                                                                                                                                   | -1 |
|                     | Nothing                                                                                                                                | -1 |     |                                                                                                                                                 |    |
| Preventive measures |                                                                                                                                        |    |     |                                                                                                                                                 |    |
|                     | The preventive measures that have been taken in the country due to the coronavirus (COVID-19) epidemic seem to you:                    |    |     | Of the following measures to avoid contagion by coronavirus COVID-19 mention if you have done them and if you consider them useful:             |    |
| P19                 | Very excessive                                                                                                                         | 1  | P42 | Use of face masks or face masks                                                                                                                 | 1  |
|                     |                                                                                                                                        |    |     | Frequent hand washing                                                                                                                           | 1  |
|                     |                                                                                                                                        |    |     | Use of disinfectant gel                                                                                                                         | 1  |
|                     |                                                                                                                                        |    |     | Disinfect the house                                                                                                                             | 1  |
|                     | Excessive                                                                                                                              | 1  |     | Do not shake hands or kiss                                                                                                                      | 1  |
|                     |                                                                                                                                        |    |     | Avoid touching your face (eyes)                                                                                                                 | 1  |

|                                                                                                                                        |                                                                    |    |                                                                                                                 |   |
|----------------------------------------------------------------------------------------------------------------------------------------|--------------------------------------------------------------------|----|-----------------------------------------------------------------------------------------------------------------|---|
|                                                                                                                                        |                                                                    |    | Handrail washing                                                                                                | 1 |
|                                                                                                                                        |                                                                    |    | Do not wear street shoes at home                                                                                | 1 |
|                                                                                                                                        |                                                                    |    | Coughing or sneezing at the inner angle of the arm                                                              | 1 |
|                                                                                                                                        | Regular                                                            | -1 | Change and wash the clothes you used on the street                                                              | 1 |
|                                                                                                                                        |                                                                    |    | Avoid using public transport                                                                                    | 1 |
|                                                                                                                                        |                                                                    |    | Avoid going to closed or open public places                                                                     | 1 |
|                                                                                                                                        | Enough                                                             | -1 | Avoid meeting with groups of many people                                                                        | 1 |
|                                                                                                                                        |                                                                    |    | Avoid going to school or work                                                                                   | 1 |
|                                                                                                                                        |                                                                    |    | Keep a distance of one and a half meters from the people you interact with                                      | 1 |
|                                                                                                                                        |                                                                    |    | Do not leave your house                                                                                         | 1 |
|                                                                                                                                        | Insufficient                                                       | -1 | Do not travel                                                                                                   | 1 |
| How much do you think the following collective actions taken by the authorities to confront the coronavirus (COVID-19) epidemic serve? |                                                                    |    | Point out whether you agree or disagree with the following statements:                                          |   |
| P48                                                                                                                                    | Suspension of classes                                              |    | Returning to work does not mean eliminating all preventive measures                                             | 1 |
|                                                                                                                                        | Cancellation of cultural, sporting and artistic events             |    |                                                                                                                 |   |
|                                                                                                                                        | Closure of cinemas, museums, theatres, bars                        |    | Preventive measures must continue to be part of our daily lives for some time                                   | 1 |
|                                                                                                                                        | Closure of parks and zoos                                          |    | It is necessary to follow the preventive measures proposed by the UNAM authorities when we return to activities | 1 |
|                                                                                                                                        | Hygienic prevention measures requested from society                |    | The main actions to reduce risks "are in our hands"                                                             | 1 |
|                                                                                                                                        | Special operation to monitor hygiene in transport                  |    | We are all co-responsible for risk prevention                                                                   | 1 |
|                                                                                                                                        | Cancellation of activities in religious spaces (temples, churches) |    | One of the fundamental values of the university community is solidarity among its members                       | 1 |
|                                                                                                                                        | Temporary suspension of activities in commercial establishments    |    |                                                                                                                 |   |
|                                                                                                                                        | Suspension of non-essential economic activities                    |    |                                                                                                                 |   |
|                                                                                                                                        | Apply to stay at home                                              |    | Solidarity with preventive measures among the UNAM community can be a very positive example for all Mexicans.   | 1 |
|                                                                                                                                        | Much                                                               | 1  |                                                                                                                 |   |
|                                                                                                                                        | A lot                                                              | 1  |                                                                                                                 |   |
|                                                                                                                                        | Regular                                                            | -1 |                                                                                                                 |   |
|                                                                                                                                        | Little                                                             | -1 | It is everyone's responsibility to make up for lost time in our UNAM activities                                 | 1 |
|                                                                                                                                        | Nothing                                                            | -1 |                                                                                                                 |   |
